# Supplementary material
Source: HighWire-hosted journal article supplement (https://www.annfammed.org/highwire/filestream/7344/field_highwire_adjunct_files/0/Crosson_Supp_App.pdf)
Supplement: Crosson_Supp_App.pdf [file Crosson_Supp_App.pdf]

**Online Supplementary Material**

Crosson JC, Etz RS, Wu S, Straus SG, Eisenman D, Bell DS. Meaningful use of electronic prescribing in 5 exemplar primary care practices. *Ann Fam Med.* 2011;9(5):392-397.

<http://www.annfammed.org/cgi/content/full/9/5/392/DC1>

**Supplemental Appendix. Advance Questionnaire for Site Visits**

| <b>Clinic Site Details for <i>Practice Site</i></b>                                                                                           |
|-----------------------------------------------------------------------------------------------------------------------------------------------|
| What were your top goals in adopting e-prescribing?                                                                                           |
| Have you monitored or measured the achievement of any specific outcomes from e-prescribing? If so, what have you measured and how did you do? |
| What other services do you provide at your site? (eg, laboratory, radiology)                                                                  |
| How is IT support provided? (Include number of IT staff FTEs and contractors)                                                                 |
| What IT applications are installed at your site? (Practice management system, e-prescribing server, etc?)                                     |
| Does the e-prescribing system have an active interface to your practice management system?                                                    |
| Number of staff FTEs at your site                                                                                                             |
| Number of clinician FTEs at your site                                                                                                         |
| Number of prescriptions written/month by e-prescribers (electronic & handwritten)                                                             |
| Distinct patients/year (approximate)                                                                                                          |
| Visits/year (approximate)                                                                                                                     |
| Roughly, what is your patient mix (Medicaid HMO, Medicaid fee for service, Medicare, 3rd party, sliding fee, uninsured, etc)?                 |
| e-prescribing = electronic prescribing; FTE = full-time equivalent; HMO = health maintenance organization; IT = information technology.       |
